# Supplementary material for: Overexpression of matrix metalloproteinase-9 (MMP-9) rescues insulin-mediated impairment in the 5XFAD model of Alzheimer’s disease
Source: PubMed Central journal article supplement (PMC5429641; doi:10.1038/s41598-017-00794-5), 2017-04-06

## Supplementary Information

### **Overexpression of matrix metalloproteinase-9 (MMP-9) rescues insulin-mediated impairment in the 5xFAD model of Alzheimer's disease**

Archontia Kaminari, Nikolas Giannakas, Athina Tzinia\* and Effie C. Tsilibary\*

\*Corresponding Authors:

Athina Tzinia, PhD

Institute of Biosciences and Applications  
NCSR "Demokritos"  
Agia Paraskevi, Athens 15310, Greece  
E-mail: atzin@bio.demokritos.gr  
Phone number: +0030 210 6503678  
Fax number: +0030 210 6511767

Effie C. Tsilibary, MD, PhD

Institute of Biosciences and Applications  
NCSR "Demokritos"  
Agia Paraskevi, Athens 15310, Greece  
E-mail: effie@bio.demokritos.gr  
Phone number: +0030 210 6503678  
Fax number: +0030 210 6511767

# Full-length Western blot images

Figure 1 A

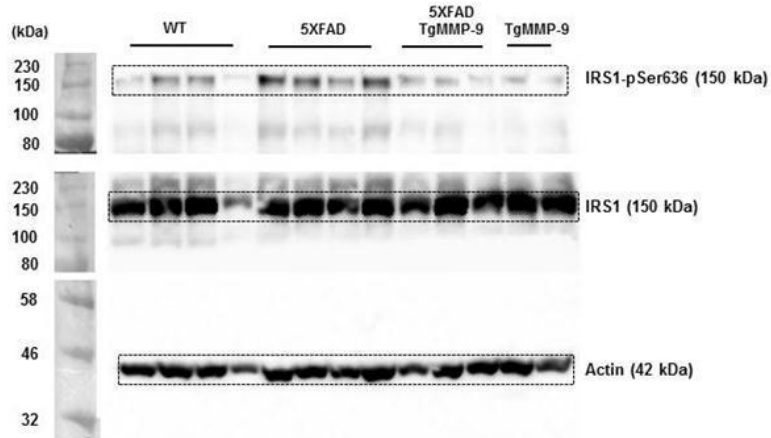

Figure 1 C

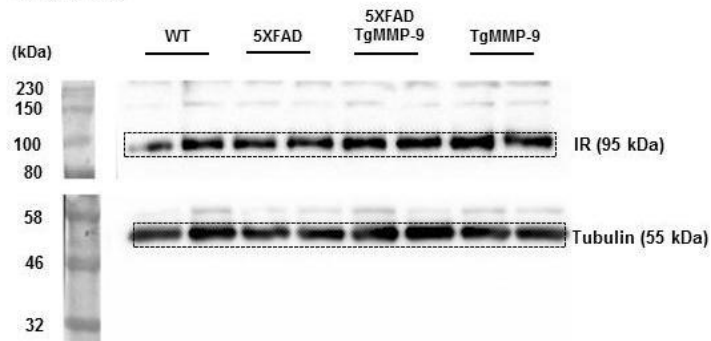

Figure 1 B, D

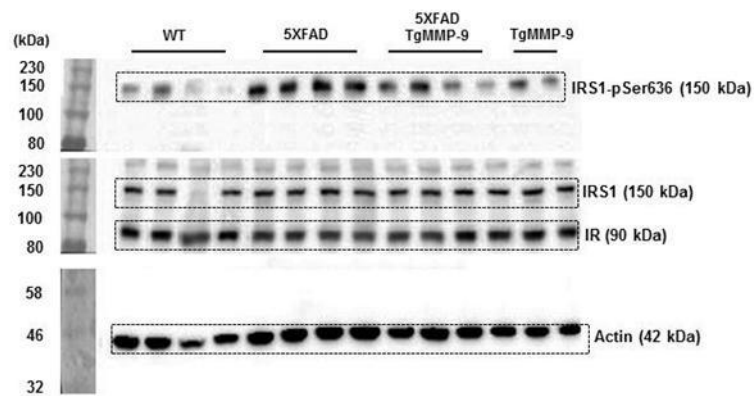

Figure 3 A, C

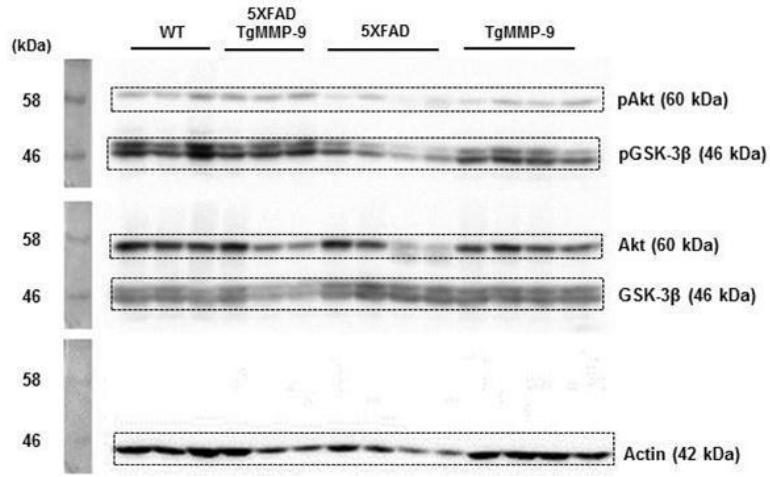

Figure 3 B

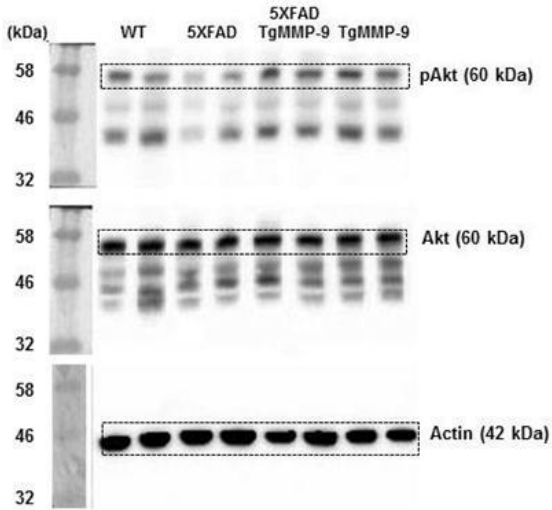

Figure 3 D

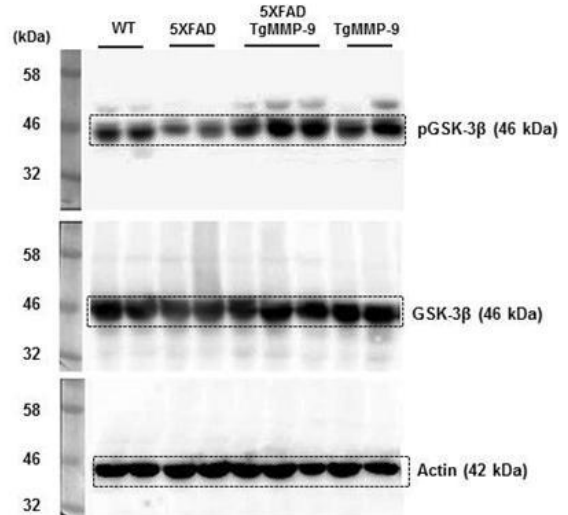

**Figure 4 A**

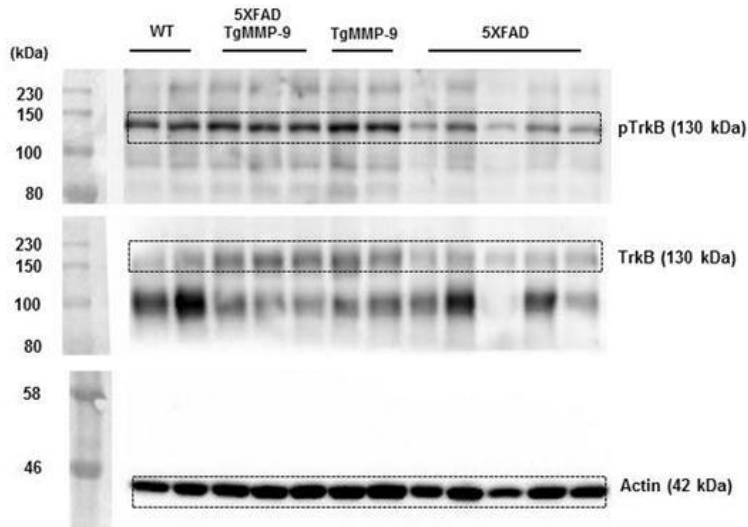

**Figure 4 B**

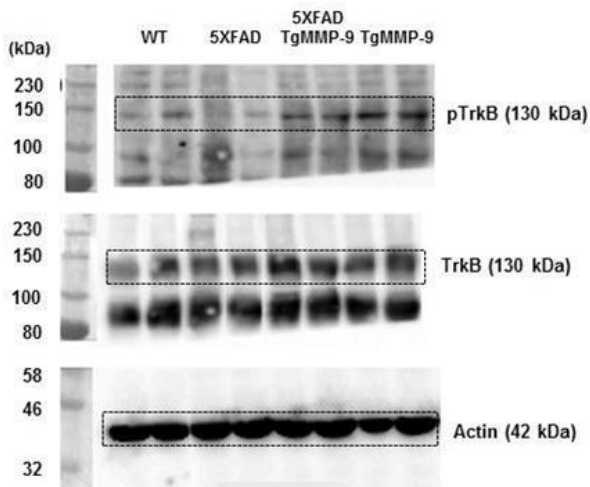

**Figure 4 C**

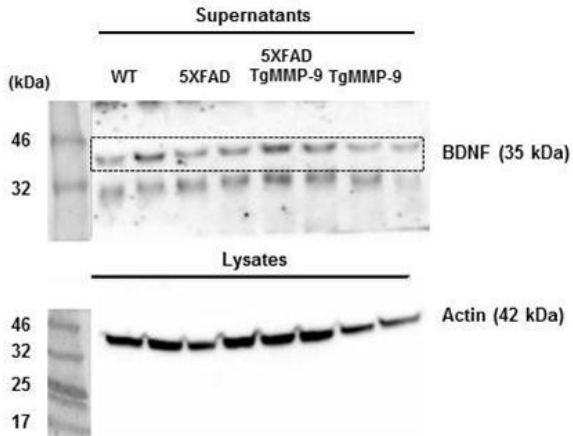

**Figure 4 D**

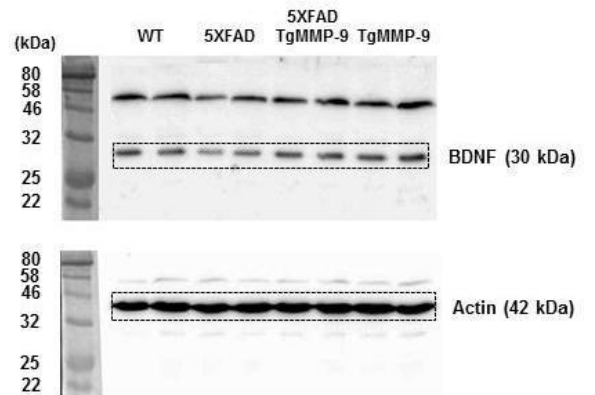

Figure 5 B

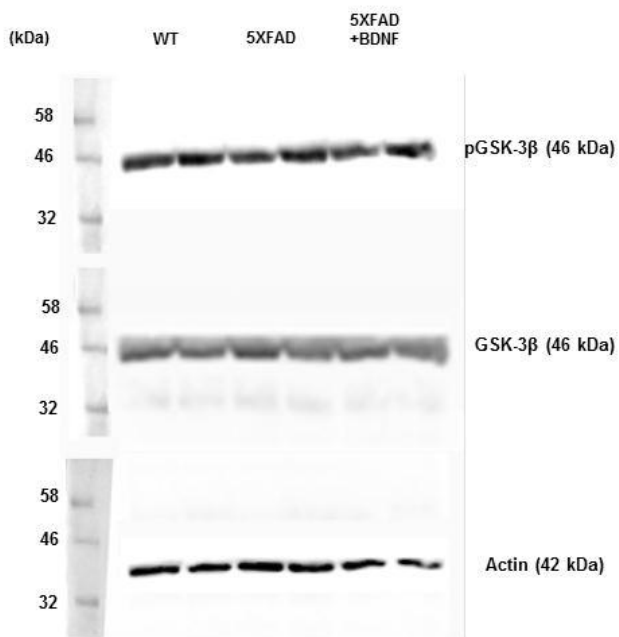

Figure 6 A

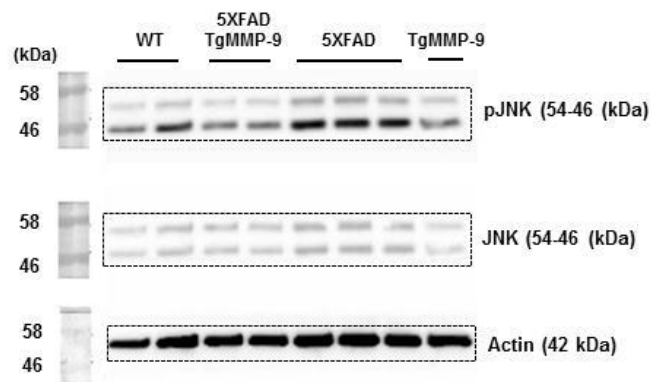

Figure 6 C

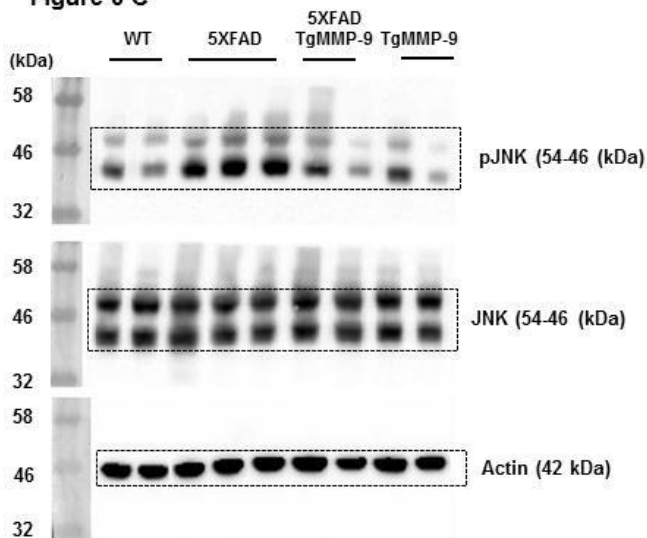

Figure 6 D

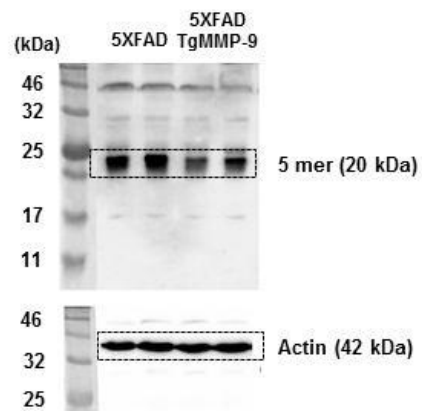

Supplement: 41598_2017_794_MOESM1_ESM.pdf [file 41598_2017_794_MOESM1_ESM.pdf]
